# Supplementary material
Source: PubMed Central journal article supplement (PMC6283287)
Supplement: 137732_1_supp_188883_pdtt03.pdf [file 137732_1_supp_188883_pdtt03.pdf]

## **Supplemental Figure Legends**

### **Supplemental Figure 1: PPP phylogenetic analysis in yeasts, mouse, and human.**

Phylogenetic analysis of PPP family members from yeast, mouse, and human. YEAST - *S. cerevisiae*, SCHPO - *S.pombe*, CANAL - *C. albicans*, and NEUCR - *N.crassa*. PPP family members identified in PIB pulldowns are highlighted.

### **Supplemental Figure 2: Determination of PIB binding capacity.**

A, Workflow to determine PIB capacity. PIBs were incubated with increased amounts of recombinant PP1 (0.5  $\mu$ g to 60  $\mu$ g), washed, and eluted. B, Ten percent of eluted PP1 was resolved on SDS-PAGE and analyzed by Coomassie Brilliant Blue staining.

### **Supplemental Figure 3: Western blot analysis of PPP catalytic subunits bound to PIB**

Western plot of PIB pulldowns from control and MCLR-treated cell lysates. The 37kDa mass marker is shown.

### **Supplemental Figure 4: Competitor titration curves for MCLR.**

MCLR competitive binding assays in 293FT cell lysates with increasing amounts of MCLR (10 fM to 10  $\mu$ M). Titration curves for PP1 $\alpha$  (A), PP1 $\beta$  (B), PP1 $\gamma$  (C), PP4C (D), PP6C (E), PP2A (F), and PP5C (G). Error bars indicate the standard deviation of triplicate analyses. Curve fitting for the binding of PPP catalytic subunits to PIBs versus free MCLR was performed using a least-squares nonlinear regression model.

### **Supplemental Figure 5: Identification of PPP interacting proteins in mouse tissue**

Volcano plots of PIB-MS analyses of six mouse tissue lysates control- or MCLR-treated. Green dots indicate specifically bound proteins in control versus MCLR-treated lysates and are listed in Supp. Table 6.

**Supplemental Tables**

**Supplemental Table 1:**

PIB pulldowns from HeLa cells in the presence and absence of MCLR.

**Supplemental Table 2:**

Competitive binding assays in 293FT cell lysates with increasing amounts of MCLR.

**Supplemental Table 3:**

PIB pulldowns from HeLa cells in the presence and absence of MCLR or OA.

**Supplemental Table 4:**

Breast cancer and glioblastoma cell lines analysis.

**Supplemental Table 5:**

Relative iBAQ abundances of regulatory subunits and endogenous inhibitors in PPP catalytic subunit purifications from “total” and PIB “depleted” 293FT lysates.

**Supplemental Table 6:**

PPPome analysis in mouse tissues by TMT-PIB-MS.

**Supplemental Table 7:**

PPPome analysis in yeast by TMT-PIB-MS.

## Supplemental References

1. Moorhead, G.B. et al. Displacement affinity chromatography of protein phosphatase one (PP1) complexes. *BMC biochemistry* **9**, 28 (2008).
2. Ferrar, T. et al. Taperin (c9orf75), a mutated gene in nonsyndromic deafness, encodes a vertebrate specific, nuclear localized protein phosphatase one alpha (PP1alpha) docking protein. *Biology open* **1**, 128-139 (2012).
3. De Wever, V. et al. The human mitotic kinesin KIF18A binds protein phosphatase 1 (PP1) through a highly conserved docking motif. *Biochemical and biophysical research communications* **453**, 432-437 (2014).
4. Hendrickx, A. et al. Docking motif-guided mapping of the interactome of protein phosphatase-1. *Chemistry & biology* **16**, 365-371 (2009).
5. Shi, W. et al. Endofin acts as a Smad anchor for receptor activation in BMP signaling. *Journal of cell science* **120**, 1216-1224 (2007).
6. Ceulemans, H., Stalmans, W. & Bollen, M. Regulator-driven functional diversification of protein phosphatase-1 in eukaryotic evolution. *BioEssays : news and reviews in molecular, cellular and developmental biology* **24**, 371-381 (2002).
7. Wang, H. & Brautigan, D.L. A novel transmembrane Ser/Thr kinase complexes with protein phosphatase-1 and inhibitor-2. *The Journal of biological chemistry* **277**, 49605-49612 (2002).
8. Terrak, M., Kerff, F., Langsetmo, K., Tao, T. & Dominguez, R. Structural basis of protein phosphatase 1 regulation. *Nature* **429**, 780-784 (2004).
9. Moorhead, G., Johnson, D., Morrice, N. & Cohen, P. The major myosin phosphatase in skeletal muscle is a complex between the beta-isoform of protein phosphatase 1 and the MYPT2 gene product. *FEBS letters* **438**, 141-144 (1998).
10. Skinner, J.A. & Saltiel, A.R. Cloning and identification of MYPT3: a prenylatable myosin targeting subunit of protein phosphatase 1. *The Biochemical journal* **356**, 257-267 (2001).
11. McAvoy, T. et al. Regulation of neurabin I interaction with protein phosphatase 1 by phosphorylation. *Biochemistry* **38**, 12943-12949 (1999).
12. Beullens, M. et al. The C-terminus of NIPP1 (nuclear inhibitor of protein phosphatase-1) contains a novel binding site for protein phosphatase-1 that is controlled by tyrosine phosphorylation and RNA binding. *The Biochemical journal* **352 Pt 3**, 651-658 (2000).
13. Helps, N.R., Barker, H.M., Elledge, S.J. & Cohen, P.T. Protein phosphatase 1 interacts with p53BP2, a protein which binds to the tumour suppressor p53. *FEBS letters* **377**, 295-300 (1995).
14. Tan, I., Ng, C.H., Lim, L. & Leung, T. Phosphorylation of a novel myosin binding subunit of protein phosphatase 1 reveals a conserved mechanism in the regulation of actin cytoskeleton. *The Journal of biological chemistry* **276**, 21209-21216 (2001).
15. Kao, S.C. et al. Identification of phostensin, a PP1 F-actin cytoskeleton targeting subunit. *Biochemical and biophysical research communications* **356**, 594-598 (2007).
16. Kwiek, N.C., Thacker, D.F., Datto, M.B., Megosh, H.B. & Haystead, T.A. PITK, a PP1 targeting subunit that modulates the phosphorylation of the transcriptional regulator hnRNP K. *Cellular signalling* **18**, 1769-1778 (2006).
17. Kreivi, J.P. et al. Purification and characterisation of p99, a nuclear modulator of protein phosphatase 1 activity. *FEBS letters* **420**, 57-62 (1997).
18. Armstrong, C.G., Browne, G.J., Cohen, P. & Cohen, P.T. PPP1R6, a novel member of the family of glycogen-targetting subunits of protein phosphatase 1. *FEBS letters* **418**, 210-214 (1997).
19. Trinkle-Mulcahy, L. et al. Repo-Man recruits PP1 gamma to chromatin and is essential for cell viability. *J Cell Biol* **172**, 679-692 (2006).

20. Shi, W. et al. GADD34-PP1c recruited by Smad7 dephosphorylates TGFbeta type I receptor. *J Cell Biol* **164**, 291-300 (2004).
21. Llorian, M., Beullens, M., Andres, I., Ortiz, J.M. & Bollen, M. SIPP1, a novel pre-mRNA splicing factor and interactor of protein phosphatase-1. *The Biochemical journal* **378**, 229-238 (2004).
22. Allen, P.B., Ouimet, C.C. & Greengard, P. Spinophilin, a novel protein phosphatase 1 binding protein localized to dendritic spines. *Proceedings of the National Academy of Sciences of the United States of America* **94**, 9956-9961 (1997).
23. Ulke-Lemee, A. et al. The nuclear PP1 interacting protein ZAP3 (ZAP) is a putative nucleoside kinase that complexes with SAM68, CIA, NF110/45, and HNRNP-G. *Biochimica et biophysica acta* **1774**, 1339-1350 (2007).
24. Herzog, F. et al. Structural probing of a protein phosphatase 2A network by chemical cross-linking and mass spectrometry. *Science* **337**, 1348-1352 (2012).
25. Hertz, E.P.T. et al. A Conserved Motif Provides Binding Specificity to the PP2A-B56 Phosphatase. *Molecular cell* **63**, 686-695 (2016).

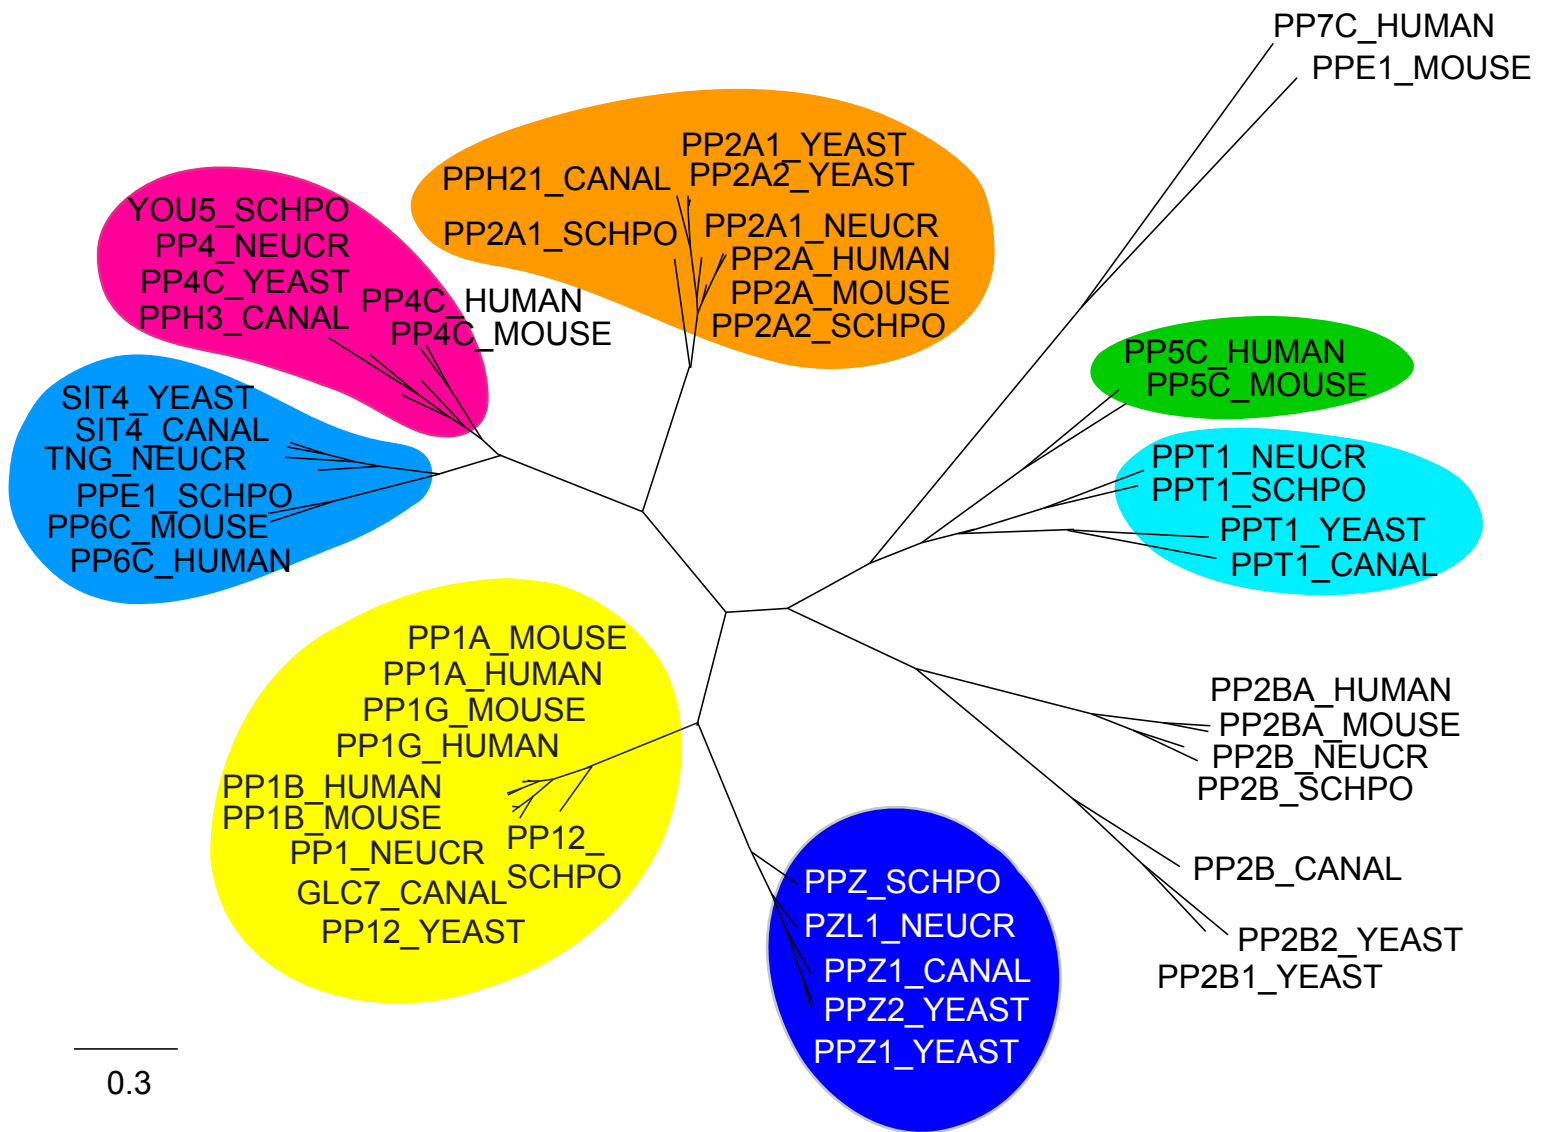

Supp. Figure 1

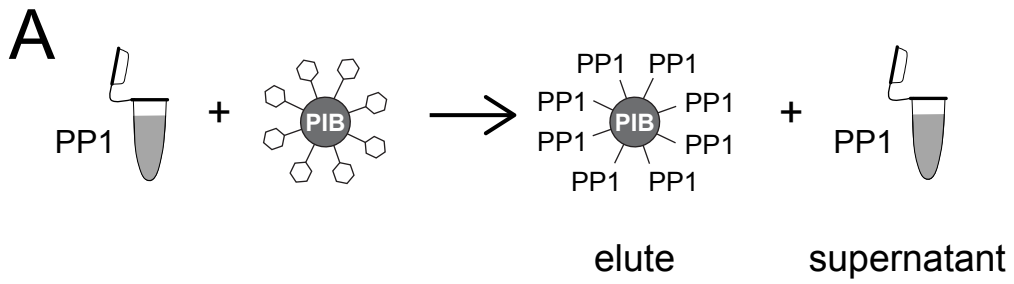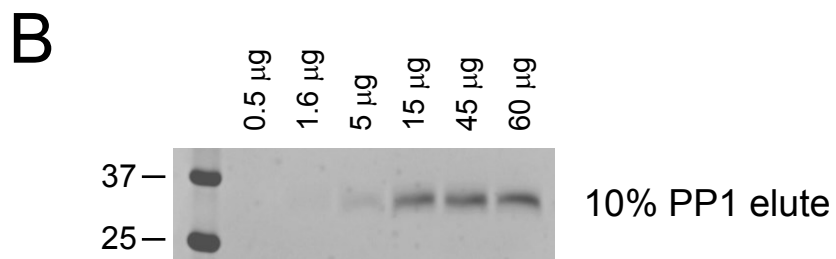

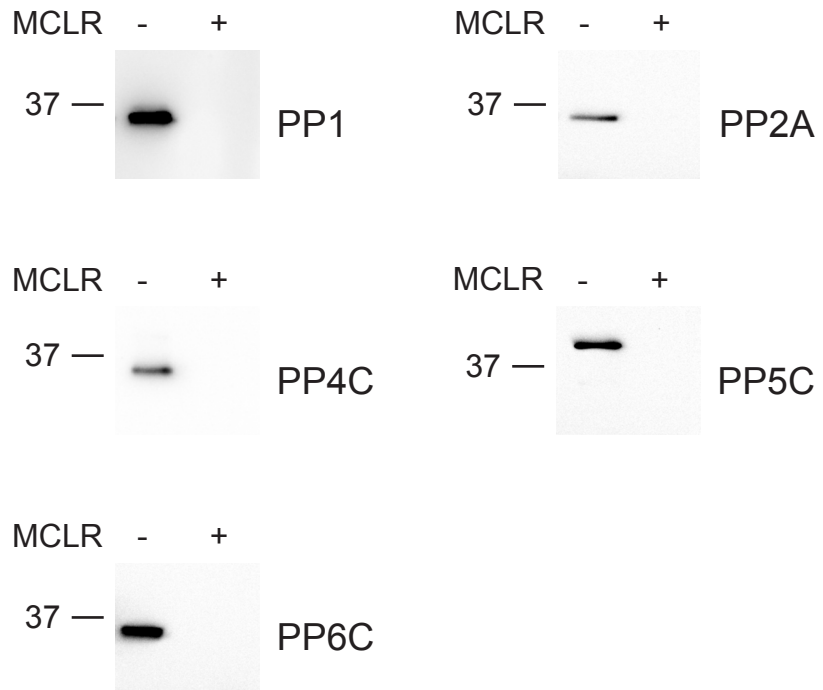

Supp. Figure 3

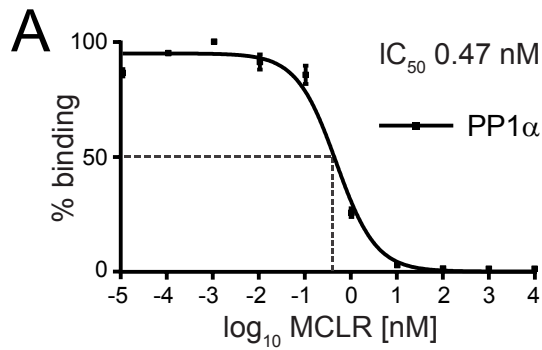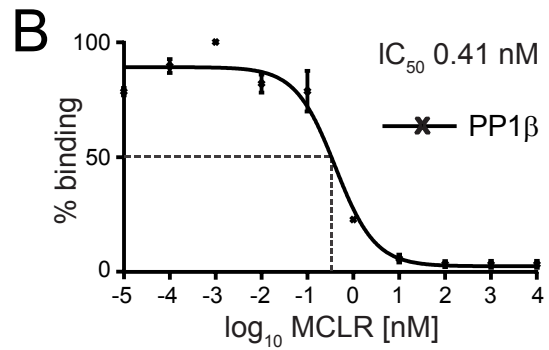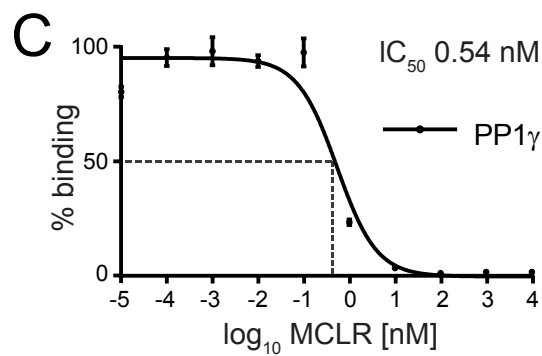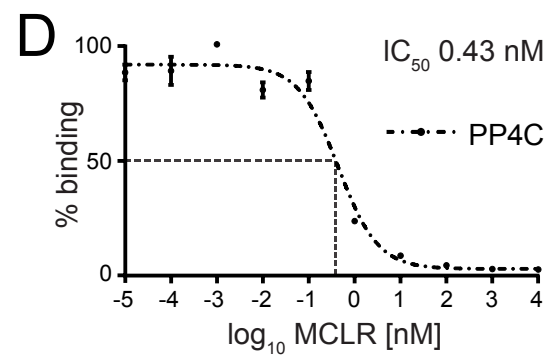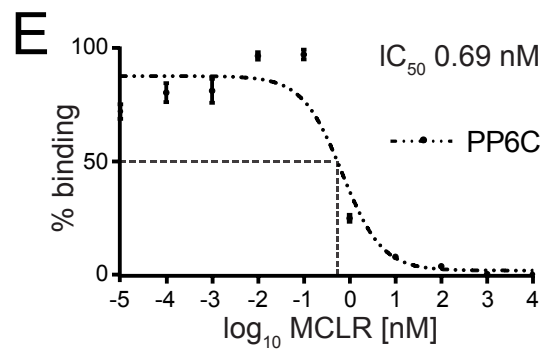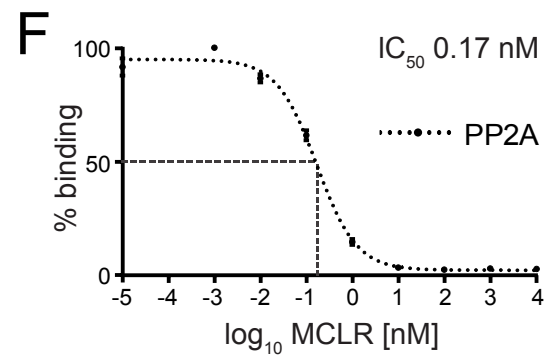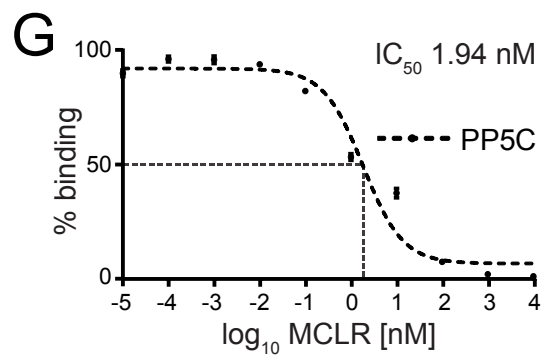

Supp. Figure 4



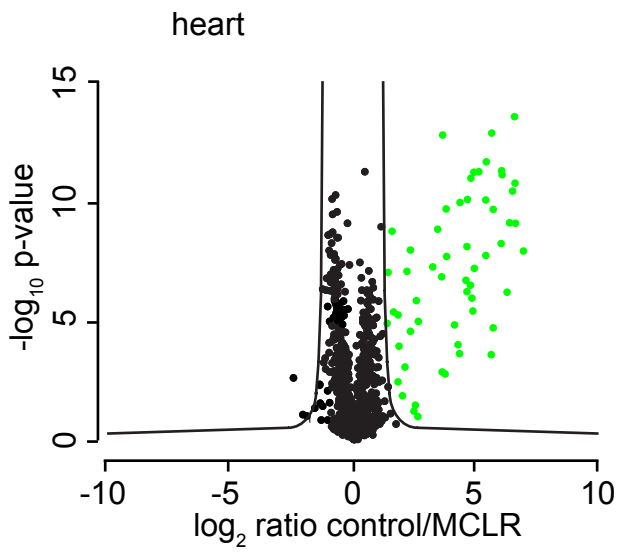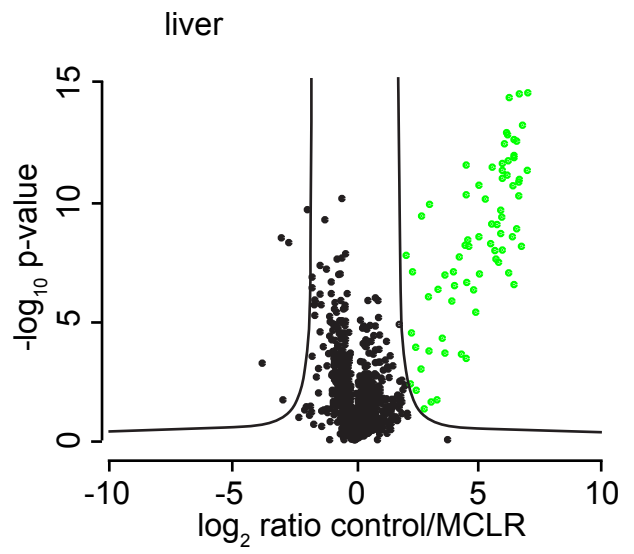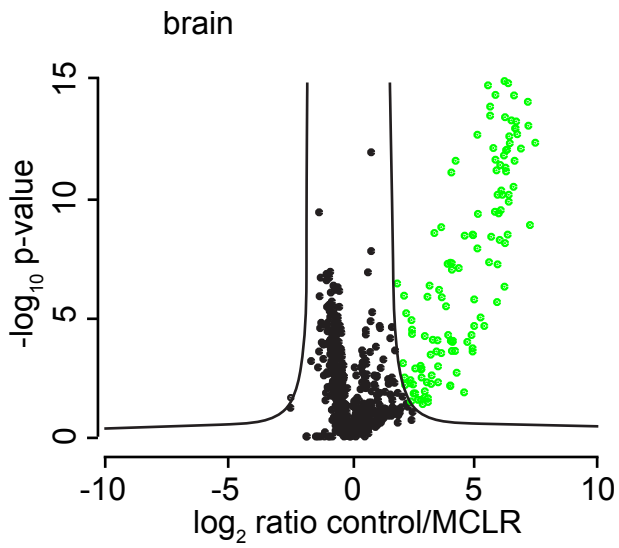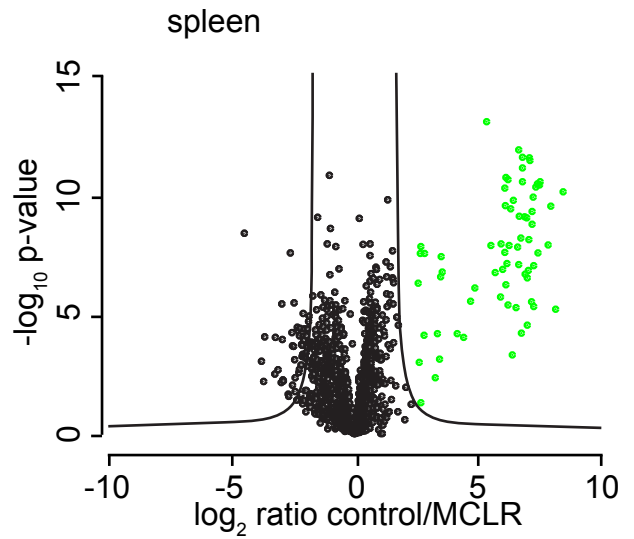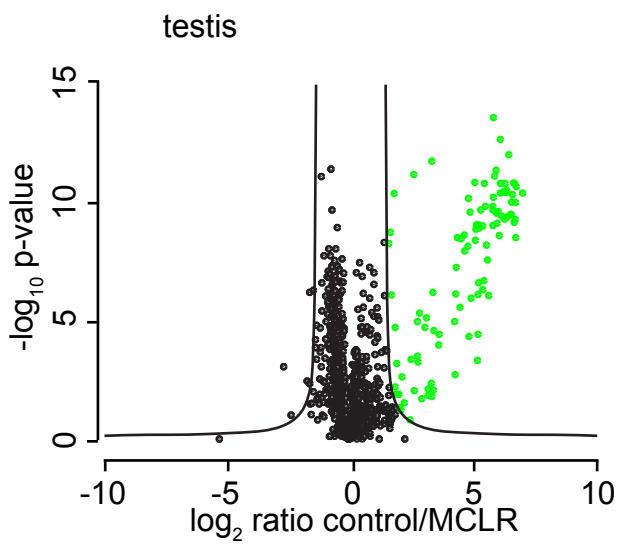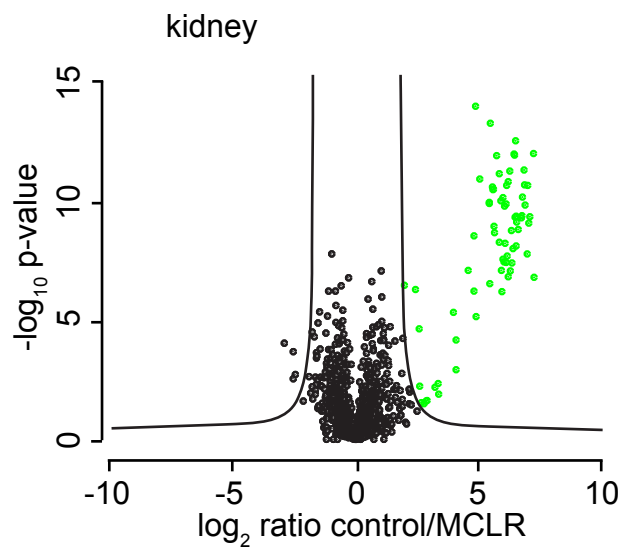

Supp. Figure 5
